# Supplementary figures and images for: Constraining Genome-Scale Models to Represent the Bow Tie Structure of Metabolism for 13C Metabolic Flux Analysis
Source: MDPI journal article supplement (doi:10.3390/metabo8010003), 2018-01-04

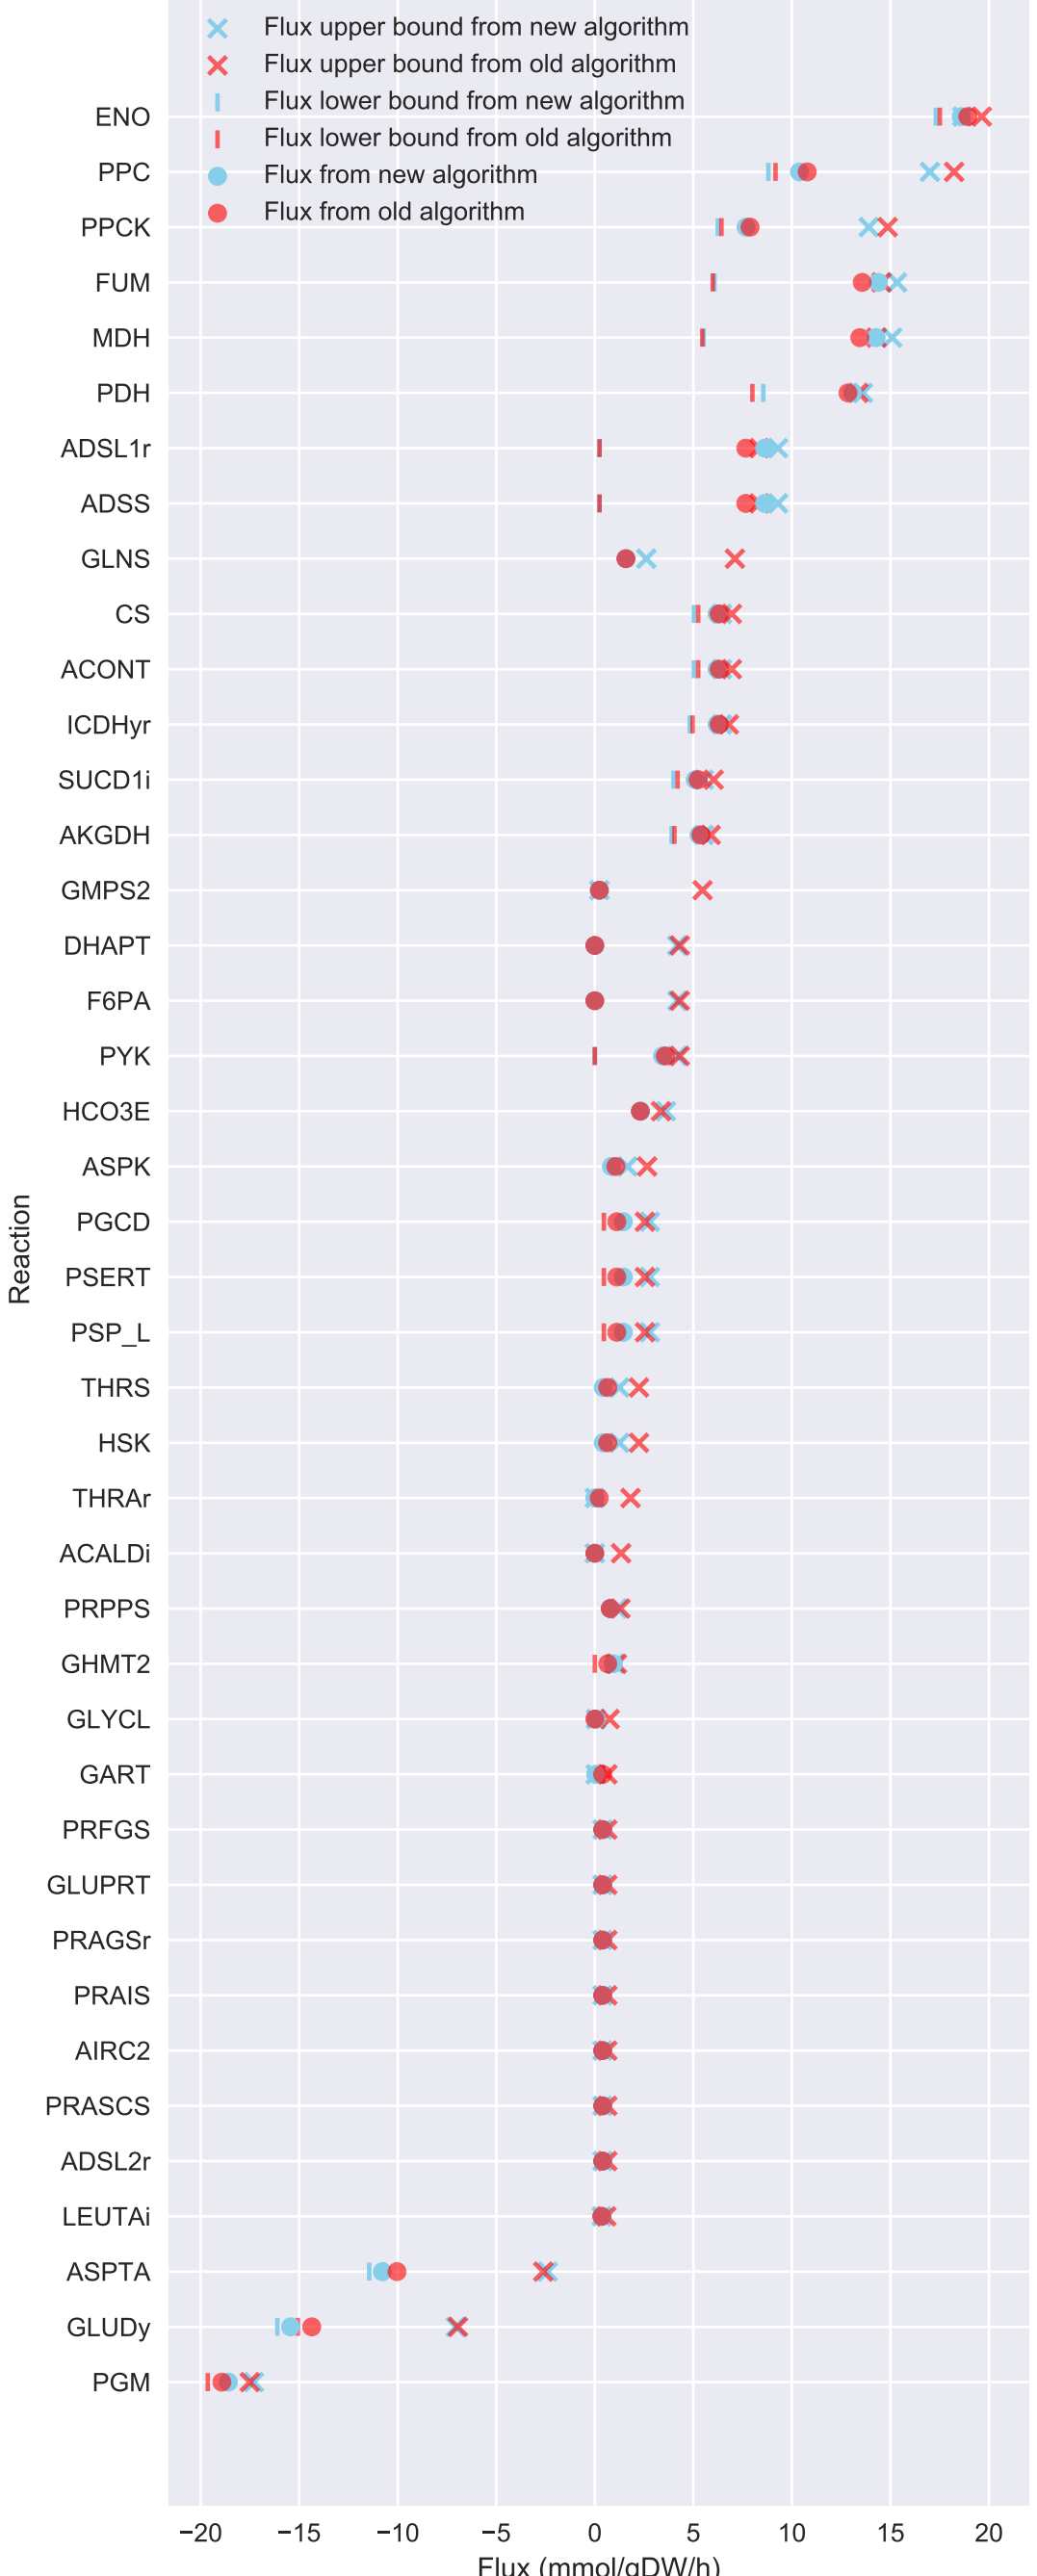

Supplement: s1 [file s1]

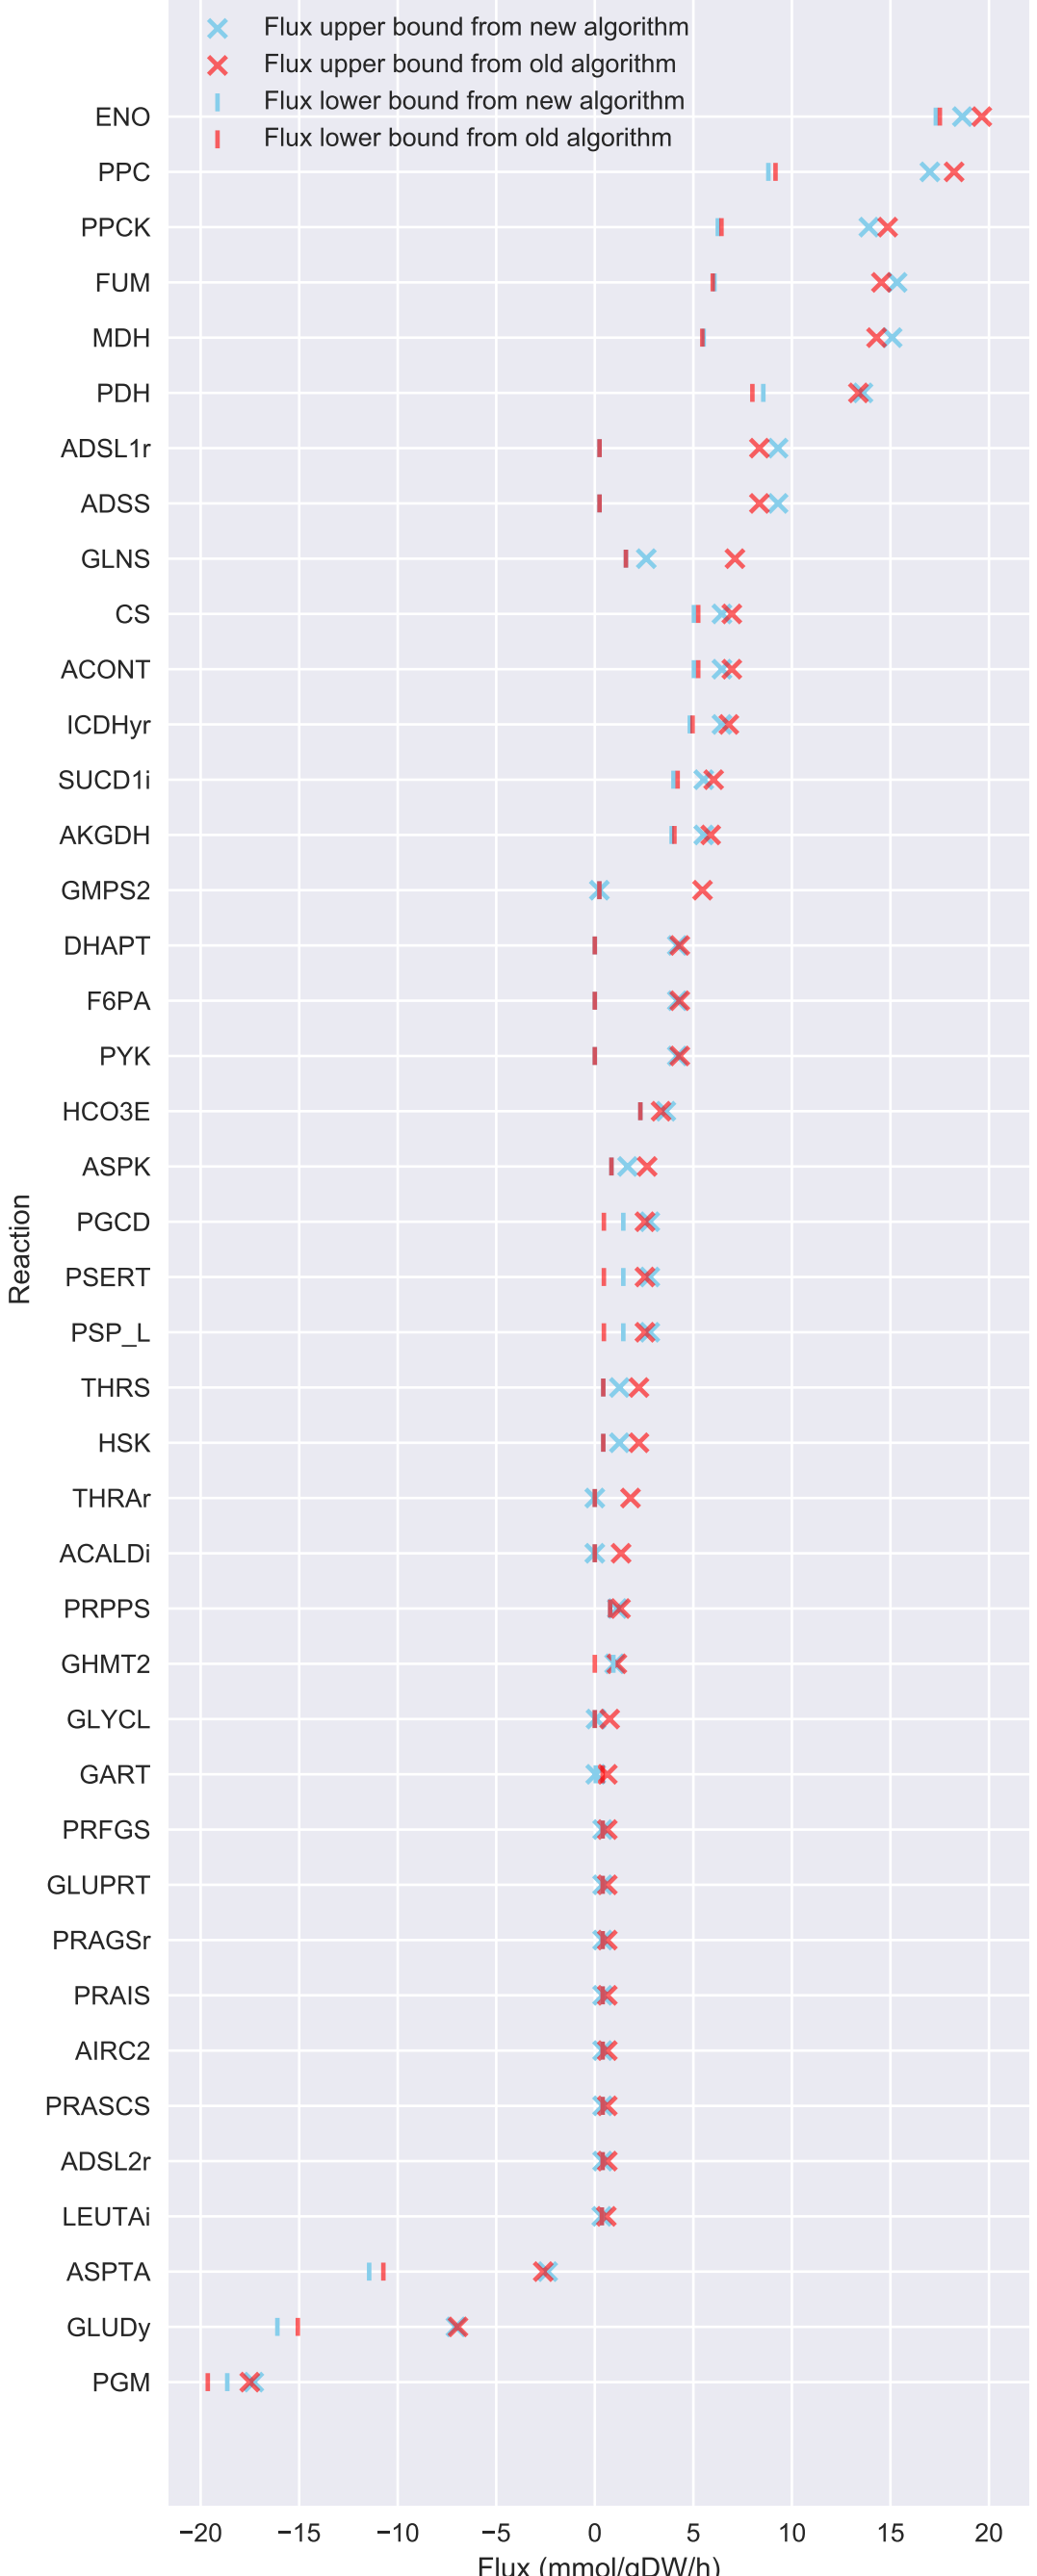

Supplement: s1 [file s1]
